# Supplementary material for: Insights into Canopy Escape Ratio from Canopy Structures: Correlations Uncovered through Sentinel-2 and Field Observation
Source: MDPI journal article supplement (doi:10.3390/f15040665), 2024-04-07
Supplement: s1 [file s1]

# Supplementary Materials

## Contents

|                |   |
|----------------|---|
| Table S1 ..... | 1 |
| Table S2 ..... | 4 |
| Table S3 ..... | 5 |
| Table S4 ..... | 6 |
| Table S5 ..... | 7 |
| Table S6.....  | 8 |
| Table S7.....  | 9 |

**Table S1.** Sentinel-2 image acquisition dates are shown in grey. Dates highlighted in black indicate Sentinel-2 images that are available for the LAI observation location, after pixel-level quality control.

| Tile  | Sentinel-2A       |                   | Sentinel-2B       |                   |
|-------|-------------------|-------------------|-------------------|-------------------|
| 52SBB | 8 February 2023   | 28 February 2023  | 4 January 2023    | 7 January 2023    |
|       | 10 March 2023     | 13 March 2023     | 26 February 2023  | 28 March 2023     |
|       | 2 April 2023      | 9 April 2023      | 7 April 2023      | 14 May 2023       |
|       | 12 April 2023     | 22 April 2023     | 3 June 2023       | 2 August 2023     |
|       | 9 May 2023        | 18 July 2023      | 5 August 2023     | 12 August 2023    |
|       | 20 August 2023    | 6 September 2023  | 15 August 2023    | 25 August 2023    |
|       | 9 September 2023  | 26 September 2023 | 11 September 2023 | 21 September 2023 |
|       | 29 September 2023 | 16 October 2023   | 1 October 2023    | 4 October 2023    |
|       | 19 October 2023   | 26 October 2023   | 21 October 2023   | 31 October 2023   |
|       | 29 October 2023   |                   | 3 November 2023   | 20 November 2023  |
|       |                   |                   | 23 November 2023  |                   |
|       |                   |                   |                   |                   |
|       |                   |                   |                   |                   |
| 52SBD | 12 January 2023   | 14 February 2023  | 10 January 2023   | 30 January 2023   |
|       | 3 March 2023      | 6 March 2023      | 26 February 2023  | 18 March 2023     |
|       | 13 March 2023     | 16 March 2023     | 21 March 2023     | 31 March 2023     |
|       | 26 March 2023     | 2 April 2023      | 10 April 2023     | 20 April 2023     |
|       | 12 April 2023     | 2 May 2023        | 27 April 2023     | 30 April 2023     |
|       | 25 May 2023       | 3 August 2023     | 5 August 2023     | 18 August 2023    |
|       | 13 August 2023    | 20 August 2023    | 25 August 2023    | 7 September 2023  |
|       | 9 September 2023  | 12 October 2023   | 17 October 2023   | 27 October 2023   |
|       | 1 November 2023   | 21 November 2023  | 23 November 2023  |                   |
|       |                   |                   |                   |                   |
| 52SBF | 2 January 2023    | 12 January 2023   | 7 January 2023    | 10 January 2023   |
|       | 1 February 2023   | 4 February 2023   | 20 January 2023   | 30 January 2023   |
|       | 14 February 2023  | 21 February 2023  | 19 February 2023  | 26 February 2023  |
|       | 24 February 2023  | 3 March 2023      | 18 March 2023     | 21 March 2023     |
|       | 6 March 2023      | 13 March 2023     | 31 March 2023     | 10 April 2023     |
|       | 16 March 2023     | 26 March 2023     | 30 April 2023     | 6 June 2023       |
|       | 2 April 2023      | 12 April 2023     | 16 June 2023      | 19 July 2023      |
|       | 15 May 2023       | 24 June 2023      | 26 July 2023      | 5 August 2023     |
|       | 21 July 2023      | 13 August 2023    | 8 August 2023     | 18 August 2023    |
|       | 2 September 2023  | 9 September 2023  | 25 August 2023    | 7 September 2023  |
|       | 2 October 2023    | 29 October 2023   | 17 October 2023   | 27 October 2023   |
|       | 1 November 2023   | 21 November 2023  | 23 November 2023  |                   |
|       |                   |                   |                   |                   |
| 52SCD | 12 January 2023   | 19 January 2023   | 4 January 2023    | 17 January 2023   |
|       | 29 January 2023   | 1 February 2023   | 26 February 2023  | 5 March 2023      |
|       | 8 February 2023   | 21 February 2023  | 28 March 2023     | 27 April 2023     |
|       | 28 February 2023  | 3 March 2023      | 14 May 2023       | 3 June 2023       |
|       | 10 March 2023     | 13 March 2023     | 2 August 2023     | 5 August 2023     |
|       | 2 April 2023      | 9 April 2023      | 15 August 2023    | 1 October 2023    |
|       | 12 April 2023     | 9 May 2023        | 11 October 2023   | 21 October 2023   |
|       | 7 August 2023     | 20 August 2023    | 31 October 2023   | 3 November 2023   |
|       | 6 September 2023  | 9 September 2023  | 13 November 2023  | 20 November 2023  |
|       | 29 September 2023 | 16 October 2023   | 23 November 2023  | 30 November 2023  |
|       | 29 October 2023   | 8 November 2023   |                   |                   |
|       | 15 November 2023  | 25 November 2023  |                   |                   |
|       | 28 November 2023  |                   |                   |                   |
| 52SCE | 2 January 2023    | 12 January 2023   | 4 January 2023    | 23 February 2023  |
|       | 19 January 2023   | 1 February 2023   | 26 February 2023  | 5 March 2023      |
|       | 8 February 2023   | 28 February 2023  | 17 April 2023     | 27 April 2023     |
|       | 3 March 2023      | 10 March 2023     | 14 May 2023       | 6 June 2023       |
|       | 13 March 2023     | 20 March 2023     | 16 June 2023      | 23 June 2023      |
|       | 2 April 2023      | 9 April 2023      | 15 August 2023    | 1 October 2023    |
|       | 22 April 2023     | 9 May 2023        | 11 October 2023   | 31 October 2023   |
|       | 18 June 2023      | 21 July 2023      | 13 November 2023  | 20 November 2023  |
|       | 7 August 2023     | 6 September 2023  | 23 November 2023  | 30 November 2023  |
|       | 9 September 2023  | 16 October 2023   |                   |                   |
|       | 29 October 2023   | 15 November 2023  |                   |                   |

|       |                                                                                                                                                                                                                                              |                                                                                                                                                                                                                                            |                                                                                                                                                                                                                     |                                                                                                                                                                                                     |
|-------|----------------------------------------------------------------------------------------------------------------------------------------------------------------------------------------------------------------------------------------------|--------------------------------------------------------------------------------------------------------------------------------------------------------------------------------------------------------------------------------------------|---------------------------------------------------------------------------------------------------------------------------------------------------------------------------------------------------------------------|-----------------------------------------------------------------------------------------------------------------------------------------------------------------------------------------------------|
|       | 25 November 2023                                                                                                                                                                                                                             |                                                                                                                                                                                                                                            |                                                                                                                                                                                                                     |                                                                                                                                                                                                     |
| 52SCF | 2 January 2023<br>19 January 2023<br>8 February 2023<br>28 February 2023<br>10 March 2023<br>20 March 2023<br>9 April 2023<br>19 April 2023<br>9 May 2023<br>9 September 2023<br>26 October 2023<br>15 November 2023<br>28 November 2023     | 12 January 2023<br>1 February 2023<br>21 February 2023<br>3 March 2023<br>13 March 2023<br>2 April 2023<br>12 April 2023<br>22 April 2023<br>21 July 2023<br>6 October 2023<br>29 October 2023<br>25 November 2023                         | 23 February 2023<br>5 March 2023<br>17 April 2023<br>3 June 2023<br>16 June 2023<br>1 October 2023<br>13 November 2023<br>23 November 2023                                                                          | 26 February 2023<br>15 March 2023<br>14 May 2023<br>6 June 2023<br>15 August 2023<br>31 October 2023<br>20 November 2023<br>30 November 2023                                                        |
| 52SCG | 2 January 2023<br>1 February 2023<br>3 March 2023<br>2 April 2023<br>9 September 2023<br>18 November 2023                                                                                                                                    | 12 January 2023<br>21 February 2023<br>13 March 2023<br>12 April 2023<br>29 October 2023                                                                                                                                                   | 26 February 2023<br>16 June 2023<br>13 November 2023                                                                                                                                                                | 7 April 2023<br>24 September 2023<br>23 November 2023                                                                                                                                               |
| 52SDD | 2 January 2023<br>12 January 2023<br>29 January 2023<br>21 February 2023<br>3 March 2023<br>13 March 2023<br>9 April 2023<br>22 April 2023<br>20 August 2023<br>29 September 2023<br>29 October 2023<br>15 November 2023<br>25 November 2023 | 9 January 2023<br>19 January 2023<br>8 February 2023<br>28 February 2023<br>10 March 2023<br>2 April 2023<br>12 April 2023<br>9 May 2023<br>9 September 2023<br>16 October 2023<br>8 November 2023<br>18 November 2023<br>28 November 2023 | 4 January 2023<br>17 January 2023<br>26 February 2023<br>28 March 2023<br>27 April 2023<br>3 June 2023<br>15 August 2023<br>14 October 2023<br>31 October 2023<br>13 November 2023<br>23 November 2023              | 7 January 2023<br>27 January 2023<br>5 March 2023<br>7 April 2023<br>14 May 2023<br>5 August 2023<br>11 October 2023<br>21 October 2023<br>3 November 2023<br>20 November 2023<br>30 November 2023  |
| 52SDE | 2 January 2023<br>19 January 2023<br>1 February 2023<br>21 February 2023<br>3 March 2023<br>13 March 2023<br>2 April 2023<br>22 April 2023<br>9 September 2023<br>16 October 2023<br>15 November 2023<br>25 November 2023                    | 12 January 2023<br>29 January 2023<br>8 February 2023<br>28 February 2023<br>10 March 2023<br>20 March 2023<br>9 April 2023<br>9 May 2023<br>29 September 2023<br>29 October 2023<br>18 November 2023<br>28 November 2023                  | 4 January 2023<br>23 February 2023<br>5 March 2023<br>7 April 2023<br>27 April 2023<br>6 June 2023<br>5 August 2023<br>1 October 2023<br>11 October 2023<br>3 November 2023<br>20 November 2023<br>30 November 2023 | 27 January 2023<br>26 February 2023<br>28 March 2023<br>17 April 2023<br>14 May 2023<br>16 June 2023<br>15 August 2023<br>4 October 2023<br>31 October 2023<br>13 November 2023<br>23 November 2023 |
| 52SDF | 2 January 2023<br>19 January 2023<br>8 February 2023<br>28 February 2023<br>10 March 2023<br>2 April 2023<br>19 April 2023<br>9 May 2023<br>6 October 2023<br>29 October 2023<br>18 November 2023<br>28 November 2023                        | 12 January 2023<br>1 February 2023<br>21 February 2023<br>3 March 2023<br>13 March 2023<br>9 April 2023<br>22 April 2023<br>9 September 2023<br>26 October 2023<br>15 November 2023<br>25 November 2023                                    | 4 January 2023<br>26 February 2023<br>15 March 2023<br>7 April 2023<br>14 May 2023<br>16 June 2023<br>24 September 2023<br>31 October 2023<br>13 November 2023<br>23 November 2023                                  | 23 February 2023<br>5 March 2023<br>28 March 2023<br>17 April 2023<br>6 June 2023<br>15 August 2023<br>1 October 2023<br>3 November 2023<br>20 November 2023<br>30 November 2023                    |
| 52SDG | 2 January 2023<br>1 February 2023<br>3 March 2023                                                                                                                                                                                            | 12 January 2023<br>8 February 2023<br>10 March 2023                                                                                                                                                                                        | 4 January 2023<br>26 February 2023<br>28 March 2023                                                                                                                                                                 | 23 February 2023<br>5 March 2023<br>7 April 2023                                                                                                                                                    |

|       |                                                                                                                                                                                                                 |                                                                                                                                                                                                                       |                                                                                                                                                                                                                      |                                                                                                                                                                                                   |
|-------|-----------------------------------------------------------------------------------------------------------------------------------------------------------------------------------------------------------------|-----------------------------------------------------------------------------------------------------------------------------------------------------------------------------------------------------------------------|----------------------------------------------------------------------------------------------------------------------------------------------------------------------------------------------------------------------|---------------------------------------------------------------------------------------------------------------------------------------------------------------------------------------------------|
|       | 13 March 2023<br>2 April 2023<br>12 April 2023<br>9 May 2023<br>28 July 2023<br>29 October 2023<br>18 November 2023<br>28 November 2023                                                                         | 30 March 2023<br>9 April 2023<br>19 April 2023<br>1 July 2023<br>9 September 2023<br>15 November 2023<br>25 November 2023                                                                                             | 17 April 2023<br>3 June 2023<br>25 August 2023<br>31 October 2023<br>20 November 2023<br>30 November 2023                                                                                                            | 27 April 2023<br>16 June 2023<br>24 September 2023<br>13 November 2023<br>23 November 2023                                                                                                        |
| 52SDH | 2 January 2023<br>1 February 2023<br>3 March 2023<br>30 March 2023<br>9 April 2023<br>28 June 2023<br>9 September 2023<br>8 November 2023<br>18 November 2023<br>28 November 2023                               | 9 January 2023<br>8 February 2023<br>13 March 2023<br>2 April 2023<br>9 May 2023<br>28 July 2023<br>29 October 2023<br>15 November 2023<br>25 November 2023                                                           | 4 January 2023<br>26 February 2023<br>28 March 2023<br>3 June 2023<br>1 September 2023<br>4 October 2023<br>31 October 2023<br>13 November 2023<br>23 November 2023                                                  | 23 February 2023<br>5 March 2023<br>7 April 2023<br>16 June 2023<br>24 September 2023<br>21 October 2023<br>10 November 2023<br>20 November 2023                                                  |
| 52SEF | 19 January 2023<br>8 February 2023<br>10 March 2023<br>9 May 2023<br>6 October 2023<br>26 October 2023<br>25 November 2023                                                                                      | 29 January 2023<br>28 February 2023<br>9 April 2023<br>28 June 2023<br>16 October 2023<br>15 November 2023                                                                                                            | 4 January 2023<br>5 March 2023<br>3 June 2023<br>1 October 2023<br>20 November 2023                                                                                                                                  | 23 February 2023<br>15 March 2023<br>22 August 2023<br>31 October 2023<br>30 November 2023                                                                                                        |
| 52SEG | 2 January 2023<br>29 January 2023<br>8 February 2023<br>3 March 2023<br>30 March 2023<br>9 April 2023<br>19 April 2023<br>11 June 2023<br>28 July 2023<br>6 October 2023<br>29 October 2023<br>18 November 2023 | 12 January 2023<br>1 February 2023<br>21 February 2023<br>13 March 2023<br>2 April 2023<br>12 April 2023<br>9 May 2023<br>28 June 2023<br>9 September 2023<br>26 October 2023<br>15 November 2023<br>28 November 2023 | 4 January 2023<br>27 January 2023<br>23 February 2023<br>5 March 2023<br>28 March 2023<br>27 April 2023<br>3 June 2023<br>5 August 2023<br>25 August 2023<br>31 October 2023<br>13 November 2023<br>23 November 2023 | 7 January 2023<br>16 February 2023<br>26 February 2023<br>18 March 2023<br>7 April 2023<br>14 May 2023<br>16 June 2023<br>22 August 2023<br>1 October 2023<br>3 November 2023<br>20 November 2023 |

**Table S2.** Relationship between LAI and Sentinel-based  $f_{esc}$  and NIRv across different forest types without topographic correction. Five forest types—deciduous broadleaf forest (DBF), deciduous needleleaf forest (DNF), evergreen broadleaf forest (EBF), evergreen needleleaf forest (ENF), and mixed forest (MF). **\*\*\*** denotes statistically highly significant (p-value < 0.001), and **\*\*** indicates statistically significant (p-value < 0.05).

(a) Relationship between SNAP LAI (x-axis) and Sentinel-based  $f_{esc}$  (y-axis)

| Forest Type | Slope | Intercept | R <sup>2</sup> |
|-------------|-------|-----------|----------------|
| DBF**       | 0.03  | 0.23      | 0.35           |
| DNF**       | 0.10  | -0.04     | 0.61           |
| EBF**       | 0.04  | 0.20      | 0.40           |
| ENF**       | -0.10 | 0.30      | 0.61           |
| MF**        | 0.04  | 0.18      | 0.65           |

(b) Relationship between field-based LAI (x-axis) and Sentinel-based  $f_{esc}$  (y-axis)

| Forest Type | Slope | Intercept | R <sup>2</sup> |
|-------------|-------|-----------|----------------|
| DBF**       | 0.03  | 0.23      | 0.14           |
| DNF**       | 0.05  | 0.20      | 0.00           |
| EBF**       | 0.04  | 0.23      | 0.22           |
| ENF**       | 0.08  | 0.06      | 0.96           |
| MF**        | 0.01  | 0.25      | 0.01           |

(c) Relationship between SNAP LAI (x-axis) and Sentinel-based NIRv (y-axis)

| Forest Type | Slope | Intercept | R <sup>2</sup> |
|-------------|-------|-----------|----------------|
| DBF**       | 0.07  | 0.03      | 0.92           |
| DNF**       | 0.11  | -0.14     | 0.76           |
| EBF**       | 0.05  | 0.11      | 0.71           |
| ENF**       | 0.03  | 0.06      | 0.38           |
| MF**        | 0.07  | 0.03      | 0.97           |

(d) Relationship between field-based LAI (x-axis) and Sentinel-based NIRv (y-axis)

| Forest Type | Slope | Intercept | R <sup>2</sup> |
|-------------|-------|-----------|----------------|
| DBF**       | 0.09  | 0.00      | 0.55           |
| DNF**       | 0.20  | -0.23     | 0.05           |
| EBF**       | 0.03  | 0.22      | 0.13           |
| ENF**       | 0.01  | 0.08      | 0.04           |
| MF**        | 0.03  | 0.12      | 0.06           |

**Table S3.** Relationship between LAI and Sentinel-based  $f_{esc}$  and NIRv on different forest types with topographic correction. Five forest types—deciduous broadleaf forest (DBF), deciduous needleleaf forest (DNF), evergreen broadleaf forest (EBF), evergreen needleleaf forest (ENF), and mixed forest (MF). ‘\*\*\*’ denotes statistically highly significant (p-value < 0.001), and ‘\*\*’ indicates statistically significant (p-value < 0.05).

(a) Relationship between SNAP LAI (x-axis) and Sentinel-based  $f_{esc}$  (y-axis)

| Forest Type | Slope | Intercept | R <sup>2</sup> |
|-------------|-------|-----------|----------------|
| DBF**       | 0.03  | 0.23      | 0.24           |
| DNF**       | 0.12  | -0.07     | 0.59           |
| EBF**       | 0.04  | 0.20      | 0.38           |
| ENF**       | -0.08 | 0.25      | 0.58           |
| MF**        | 0.04  | 0.17      | 0.59           |

(b) Relationship between field-based LAI (x-axis) and Sentinel-based  $f_{esc}$  (y-axis)

| Forest Type | Slope | Intercept | R <sup>2</sup> |
|-------------|-------|-----------|----------------|
| DBF**       | 0.03  | 0.23      | 0.09           |
| DNF**       | 0.04  | 0.23      | 0.00           |
| EBF**       | 0.04  | 0.23      | 0.22           |
| ENF**       | 0.07  | 0.05      | 0.97           |
| MF**        | 0.00  | 0.26      | 0.00           |

(c) Relationship between SNAP LAI (x-axis) and Sentinel-based NIRv (y-axis)

| Forest Type | Slope | Intercept | R <sup>2</sup> |
|-------------|-------|-----------|----------------|
| DBF**       | 0.07  | 0.03      | 0.89           |
| DNF**       | 0.12  | -0.17     | 0.74           |
| EBF**       | 0.05  | 0.12      | 0.69           |
| ENF**       | 0.02  | 0.05      | 0.32           |
| MF**        | 0.07  | 0.03      | 0.94           |

(d) Relationship between field-based LAI (x-axis) and Sentinel-based NIRv (y-axis)

| Forest Type | Slope | Intercept | R <sup>2</sup> |
|-------------|-------|-----------|----------------|
| DBF**       | 0.09  | 0.00      | 0.53           |
| DNF**       | 0.19  | -0.21     | 0.04           |
| EBF**       | 0.03  | 0.22      | 0.13           |
| ENF**       | 0.01  | 0.07      | 0.08           |
| MF**        | 0.02  | 0.12      | 0.04           |

**Table S4.** Relationship between CI and Sentinel-based  $f_{esc}$  and NIRv on different forest types without topographic correction. Five forest types—deciduous broadleaf forest (DBF), deciduous needleleaf forest (DNF), evergreen broadleaf forest (EBF), evergreen needleleaf forest (ENF), and mixed forest (MF). ‘\*\*\*’ denotes statistically highly significant (p-value < 0.001), and ‘\*\*’ indicates statistically significant (p-value < 0.05).

(a) Relationship between field-based CI (x-axis) and Sentinel-based  $f_{esc}$  (y-axis)

| Forest Type | Slope | Intercept | R <sup>2</sup> |
|-------------|-------|-----------|----------------|
| DBF**       | 0.23  | 0.08      | 0.05           |
| DNF**       | -2.62 | 2.26      | 0.96           |
| EBF**       | -0.24 | 0.56      | 0.15           |
| ENF**       | -0.93 | 0.87      | 0.92           |
| MF**        | 0.19  | 0.10      | 0.04           |

(b) Relationship between field-based CI (x-axis) and Sentinel-based NIRv (y-axis)

| Forest Type | Slope | Intercept | R <sup>2</sup> |
|-------------|-------|-----------|----------------|
| DBF**       | -0.06 | 0.19      | 0.00           |
| DNF**       | -2.62 | 2.19      | 1.00           |
| EBF**       | -0.20 | 0.48      | 0.11           |
| ENF**       | 0.09  | 0.02      | 0.08           |
| MF**        | 0.32  | -0.10     | 0.07           |

**Table S5.** Relationship between CI and Sentinel-based  $f_{esc}$  and NIRv on different forest types with topographic correction. Five forest types—deciduous broadleaf forest (DBF), deciduous needleleaf forest (DNF), evergreen broadleaf forest (EBF), evergreen needleleaf forest (ENF), and mixed forest (MF). ‘\*\*\*’ denotes statistically highly significant (p-value < 0.001), and ‘\*\*’ indicates statistically significant (p-value < 0.05).

(a) Relationship between field-based (x-axis) and Sentinel-based  $f_{esc}$  (y-axis)

| Forest Type | Slope | Intercept | R <sup>2</sup> |
|-------------|-------|-----------|----------------|
| DBF**       | 0.27  | 0.05      | 0.05           |
| DNF**       | -2.96 | 2.51      | 0.95           |
| EBF**       | -0.24 | 0.57      | 0.15           |
| ENF**       | -0.82 | 0.77      | 0.90           |
| MF**        | 0.31  | -0.01     | 0.09           |

(b) Relationship between field-based CI (x-axis) and Sentinel-based NIRv (y-axis)

| Forest Type | Slope | Intercept | R <sup>2</sup> |
|-------------|-------|-----------|----------------|
| DBF**       | -0.06 | 0.19      | 0.00           |
| DNF**       | -2.90 | 2.41      | 0.99           |
| EBF**       | -0.21 | 0.49      | 0.11           |
| ENF**       | 0.06  | 0.03      | 0.05           |
| MF**        | 0.38  | -0.16     | 0.10           |



**Table S6.** Relationship between LAI×CI and Sentinel-based  $f_{esc}$  and NIRv on different forest types without topographic correction. Five forest types—deciduous broadleaf forest (DBF), deciduous needleleaf forest (DNF), evergreen broadleaf forest (EBF), evergreen needleleaf forest (ENF), and mixed forest (MF). ‘\*\*\*’ denotes statistically highly significant (p-value < 0.001), and ‘\*\*’ indicates statistically significant (p-value < 0.05).

(a) Relationship between field-based (x-axis) and Sentinel-based  $f_{esc}$  (y-axis)

| Forest Type | Slope | Intercept | R <sup>2</sup> |
|-------------|-------|-----------|----------------|
| DBF**       | 0.05  | 0.22      | 0.19           |
| DNF**       | -0.76 | 1.75      | 0.66           |
| EBF**       | 0.03  | 0.27      | 0.08           |
| ENF*        | 0.13  | 0.04      | 0.91           |
| MF**        | 0.02  | 0.24      | 0.02           |

(b) Relationship between field-based CI (x-axis) and Sentinel-based NIRv (y-axis)

| Forest Type | Slope | Intercept | R <sup>2</sup> |
|-------------|-------|-----------|----------------|
| DBF**       | 0.11  | -0.01     | 0.60           |
| DNF**       | -0.65 | 1.47      | 0.50           |
| EBF**       | 0.02  | 0.25      | 0.03           |
| ENF*        | 0.01  | 0.08      | 0.09           |
| MF**        | 0.05  | 0.10      | 0.11           |

**Table S7.** Relationship between LAI×CI and Sentinel-based  $f_{esc}$  and NIRv on different forest types with topographic correction. Five forest types—deciduous broadleaf forest (DBF), deciduous needleleaf forest (DNF), evergreen broadleaf forest (EBF), evergreen needleleaf forest (ENF), and mixed forest (MF). ‘\*\*\*’ denotes statistically highly significant (p-value < 0.001), and ‘\*\*’ indicates statistically significant (p-value < 0.05).

(a) Relationship between field-based (x-axis) and Sentinel-based  $f_{esc}$  (y-axis)

| Forest Type | Slope | Intercept | R <sup>2</sup> |
|-------------|-------|-----------|----------------|
| DBF**       | 0.04  | 0.22      | 0.12           |
| DNF**       | -0.87 | 1.96      | 0.68           |
| EBF**       | 0.03  | 0.26      | 0.08           |
| ENF**       | 0.12  | 0.03      | 0.93           |
| MF**        | 0.01  | 0.24      | 0.01           |

(b) Relationship between field-based CI (x-axis) and Sentinel-based NIRv (y-axis)

| Forest Type | Slope | Intercept | R <sup>2</sup> |
|-------------|-------|-----------|----------------|
| DBF**       | 0.11  | -0.01     | 0.58           |
| DNF**       | -0.74 | 1.64      | 0.53           |
| EBF**       | 0.02  | 0.25      | 0.04           |
| ENF**       | 0.01  | 0.06      | 0.13           |
| MF**        | 0.05  | 0.10      | 0.10           |
